# Supplementary material
Source: PubMed Central journal article supplement (PMC7024042)
Supplement: NIHMS1556252-supplement-1.pdf [file NIHMS1556252-supplement-1.pdf]

# **Lack of Thy1 Defines a Pathogenic Fraction of Cardiac Fibroblasts in Heart Failure**

Yanzhen Li<sup>1</sup>, Daniel Song<sup>2,3</sup>, Lan Mao<sup>4</sup>, Dennis M. Abraham<sup>4</sup>, and Nenad Bursac<sup>1, 4\*</sup>

Supplementary Figures & Tables

## Supplementary Figure Legends:

**Supplementary Figure 1. Characterization of pressure overload-induced heart failure.** (A) Representative left echocardiograms from transverse aortic constriction (TAC) and sham-operated (Sham) mice at pre-surgery (pre) and 4 and 8 weeks post-surgery, showing pressure-overload induced ventricular dilatation and failure. (B) Echocardiographic measurements of fractional shortening (FS) in TAC and Sham mice at pre-surgery (0 weeks) and 2, 4, 6, and 8 weeks post-surgery. n=20 mice per group. (C) Representative Masson's trichrome stains and immunostaining for filamentous actin (F-actin, green), Collagen 1 (Coll1, red) or Vimentin (Vim, red), and DNA (nuclei, blue) in ventricular sections from Sham and TAC-induced heart failure (FS<30%) mice at 8 weeks post-surgery. Image quantification of the percentage of Collagen 1<sup>+</sup> area (D) and Vimentin<sup>+</sup> area (E) per cross-section. n=3 hearts per group. \*P < 0.05, \*\*P < 0.01. Scar bars: 100  $\mu$ m in Masson's Trichrome stains and 50  $\mu$ m in immunostainings.

**Supplementary Figure 2. Differential gene expression in freshly isolated and 2D-cultured cardiac fibroblasts.** Bar graphs showing *Thy1* (A), *Postn* (B), *Tgfb1* (C), *Coll1a1* (D), *Col3a1* (E), *Fnl* (F) and *Acta2* (G) gene expression in freshly isolated (P0) and cultured (passage P1 and passage P2) Thy1<sup>pos</sup> and Thy1<sup>neg</sup> CFs from Sham and TAC ventricles. The mRNA expression was normalized to house-keeping gene *B2M* and shown as fold change relative to P0 Sham Thy1<sup>pos</sup> group. N=2 independent experiments for *Thy1*, and N=4 independent experiments for all other genes. \*P < 0.05, \*\*P < 0.01, \*\*\*P < 0.001, \*\*\*\*P < 0.0001.

**Supplementary Figure 3. The percentage of apoptotic cells in engineered cardiac bundles.** (A) Representative TUNEL assay immunostaining images in bundle transverse cross-sections. (B) Image quantification of the percentage of TUNEL<sup>+</sup> apoptotic nuclei per cross-section. n=2-3 bundles per group. Scar bar: 75  $\mu$ m. #P < 0.05 for NRVM vs. all other groups.

# Supplementary Figure 1.

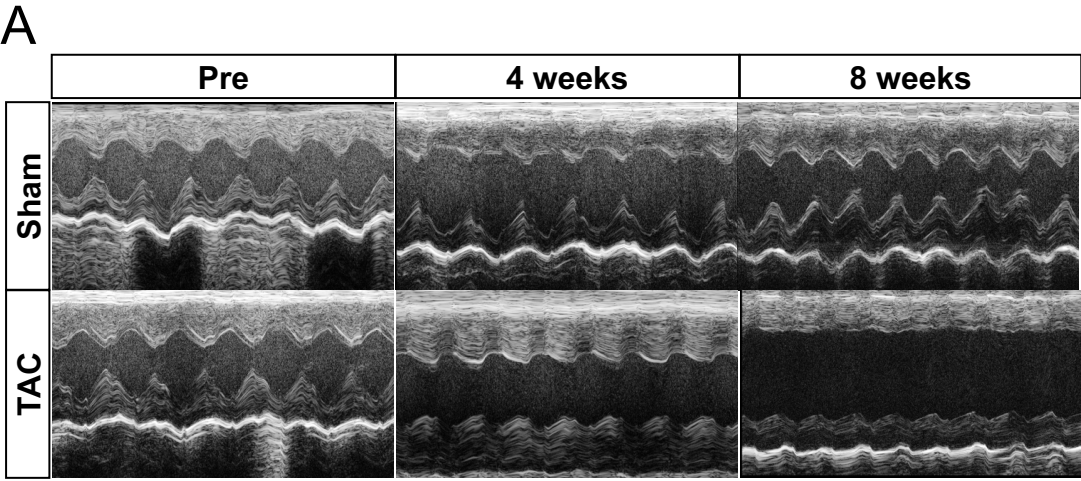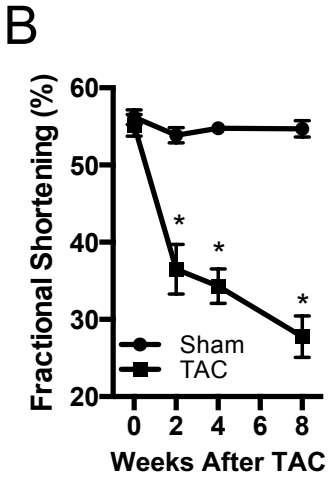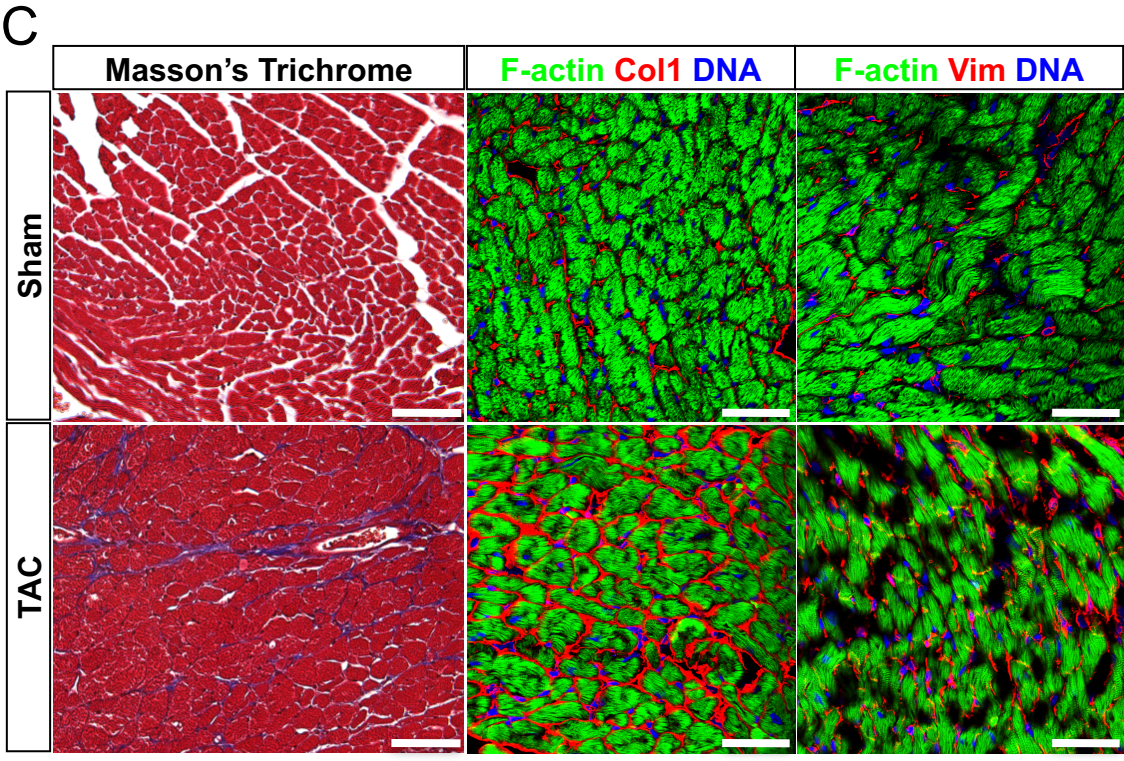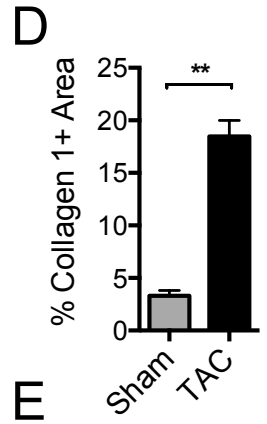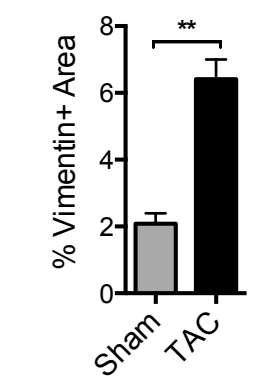

# Supplementary Figure 2.

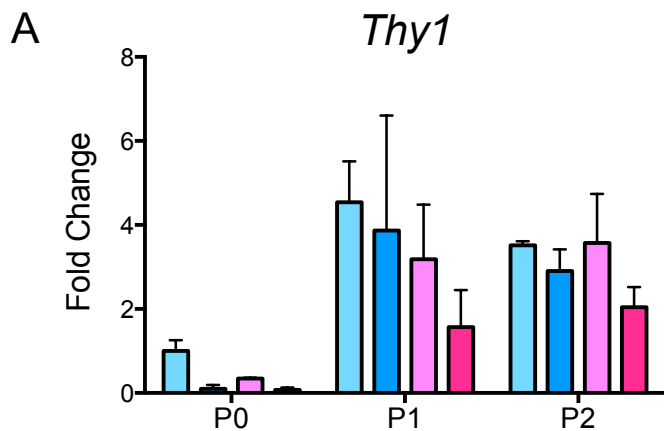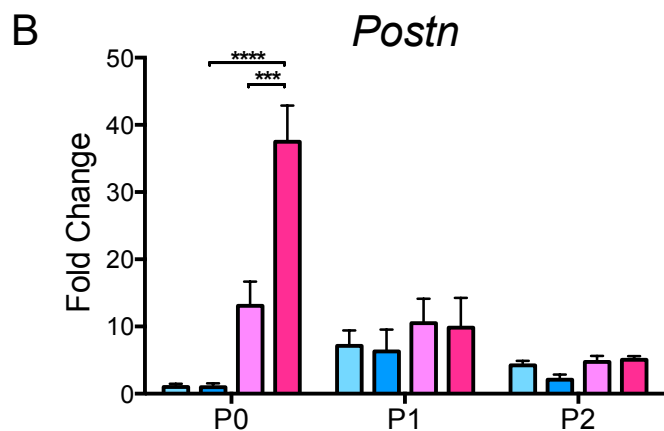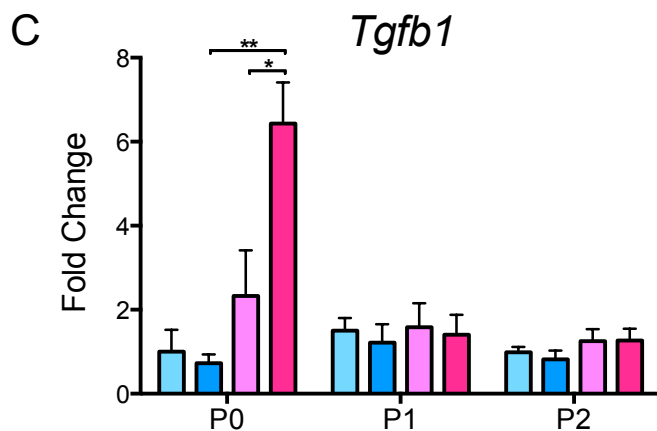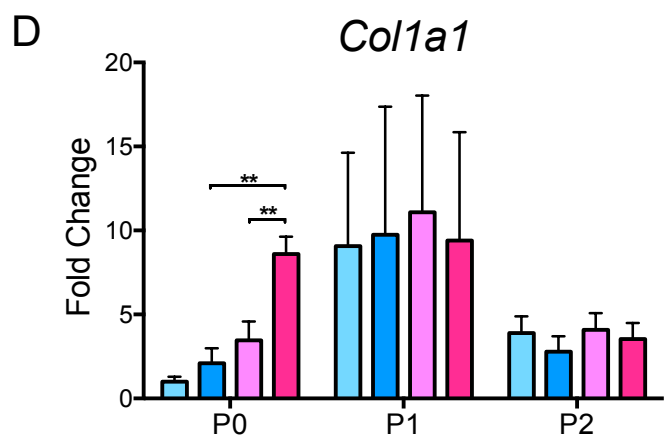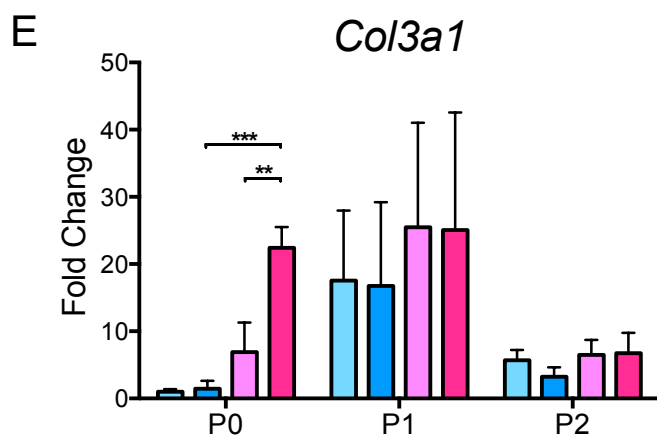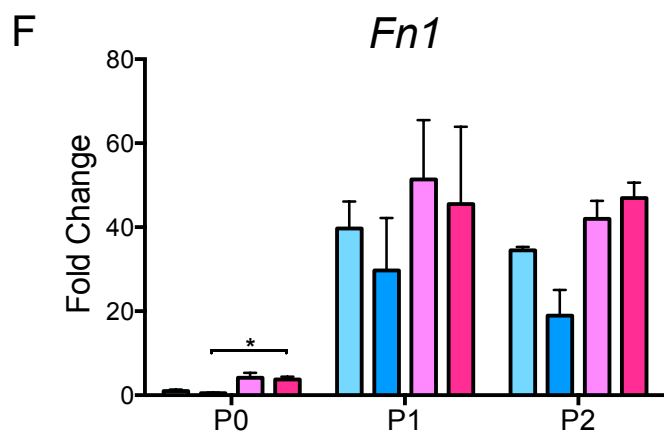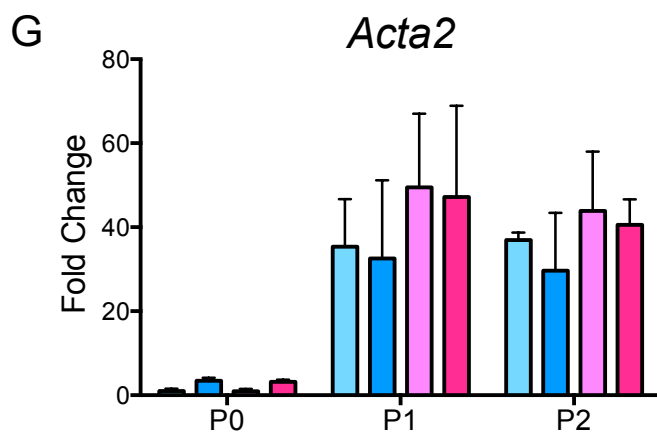

# Supplementary Figure 3.

## A

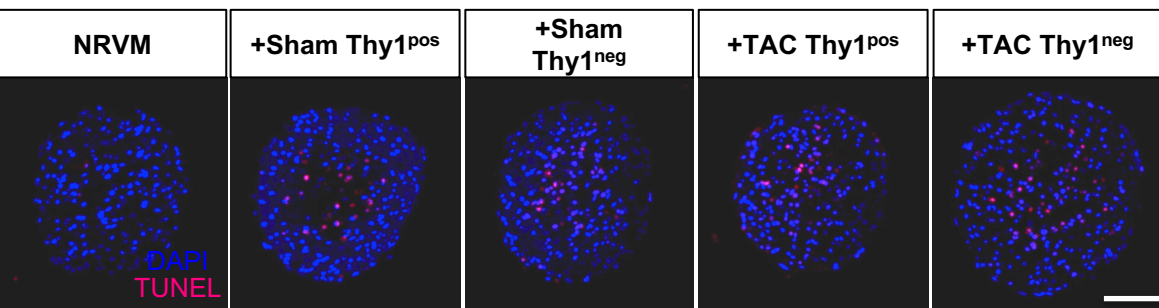

## B

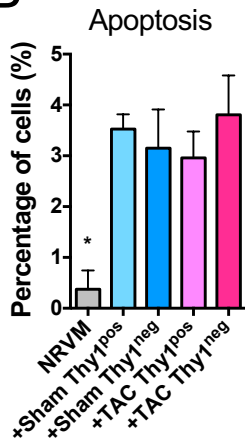

# Supplementary Table 1.

Table S1: Antibodies used in FACS

| Antibody | Clone  | Supplier (Cat#)               | Dilution | Fluorophore          |
|----------|--------|-------------------------------|----------|----------------------|
| CD31     | 390    | BioLegend (102427)            | 1:400    | Brilliant Violet 605 |
| CD45     | 30-F11 | BioLegend (103116)            | 1:200    | APC/Cy7              |
| CD90.2   | 53-2.1 | BD (553005)                   | 1:50     | PE                   |
| MEFSK4   | SK4    | Miltenyi Biotec (130-102-900) | 1:20     | APC                  |

# Supplementary Table 2.

Table S2: Primers for qPCR

| Gene          | Description                                | Forward Primer          | Reverse Primer          |
|---------------|--------------------------------------------|-------------------------|-------------------------|
| <i>Acta2</i>  | Smooth Muscle actin alpha 2 (a-SMA)        | TCAGCGTTCAGCCTCC        | CCAGAGCCATTGTCCG        |
| <i>B2M</i>    | Beta-2 Microglobulin                       | GGTCTTTCTGGTGCTTGTCT    | ACGTAGCAGTTCAGTATGTTCCG |
| <i>Col1a1</i> | Collagen type I alpha 1 chain              | TGGTGAAGCAGGCAAGC       | GAAACCTCTCTCGCCTCTTG    |
| <i>Col3a1</i> | Collagen type III alpha 1 chain            | GGTGAACCTGGTCAAGCTG     | TCTTCCTGACTCTCCATCCT    |
| <i>Fn1</i>    | Fibronectin 1                              | GAGCTATCCATTTACCTTCAGA  | TTGTTTCGTAGACACTGGAGAC  |
| <i>Thy1</i>   | Thymus cell antigen 1                      | TGCTCTCAGTCTTGCAGGTG    | TGGATGGAGTTATCCTTGGTGTT |
| <i>Postn</i>  | Periostin                                  | CCTGTAAGAACTGGTATCAAGGT | CCTTTCATCCCTTCCATTCTCA  |
| <i>Tgfb1</i>  | Transforming growth factor beta 1          | GCGGACTACTATGCTAAAGAGG  | CCGAATGTCTGACGTATTGAAGA |
| <i>Wisp1</i>  | WNT1 inducible signaling pathway protein 1 | AGGTACGCAATAGGAGTGTGTG  | AGTTGTACCTGCAGTTGGGTTG  |

# Supplementary Table 3.

| Base          | LVEDD (mm)   | LVESD (mm)   | SWT (mm)    | PWT (mm)     | AET (ms)      | HR (BPM)        | FS (%)       | LVm (mg)       | mVcFc (circ/s) |
|---------------|--------------|--------------|-------------|--------------|---------------|-----------------|--------------|----------------|----------------|
| WT Sham (n=6) | 3.16 ± 0.06  | 1.52 ± 0.07  | 0.85 ± 0.06 | 1.03 ± 0.03  | 38.48 ± 2.09  | 731.88 ± 17.6   | 51.94 ± 1.6  | 82.08 ± 4.83   | 3.94 ± 0.28    |
| KO Sham (n=6) | 3.38 ± 0.11  | 1.76 ± 0.12  | 0.78 ± 0.07 | 0.79 ± 0.03# | 47.32 ± 3.62  | 556.3 ± 66.93#  | 48.09 ± 2.34 | 69.04 ± 2.18   | 3.49 ± 0.29    |
| WT TAC (n=10) | 3.17 ± 0.1   | 1.52 ± 0.08  | 0.94 ± 0.03 | 1.07 ± 0.04  | 36.84 ± 1.02  | 714.05 ± 13.36  | 52.32 ± 1.24 | 89.81 ± 3.36   | 4.14 ± 0.11    |
| KO TAC (n=11) | 3.45 ± 0.16  | 1.8 ± 0.12   | 0.87 ± 0.04 | 0.98 ± 0.07  | 46.32 ± 2.37* | 447.05 ± 44.06* | 48.4 ± 1.5   | 89.22 ± 2.94   | 4.01 ± 0.18    |
| 1-week        | LVEDD (mm)   | LVESD (mm)   | SWT (mm)    | PWT (mm)     | AET (ms)      | HR (BPM)        | FS (%)       | LVm (mg)       | mVcFc (circ/s) |
| WT Sham (n=6) | 2.99 ± 0.15  | 1.41 ± 0.07  | 0.85 ± 0.04 | 0.93 ± 0.05  | 39.28 ± 2.1   | 705.59 ± 18.5   | 52.65 ± 0.87 | 69.58 ± 5.52   | 3.94 ± 0.12    |
| KO Sham (n=6) | 3.2 ± 0.08   | 1.68 ± 0.09  | 0.85 ± 0.02 | 0.84 ± 0.08  | 47.54 ± 3.88  | 532 ± 77.26#    | 47.51 ± 2.37 | 71.2 ± 4.04    | 3.53 ± 0.23    |
| WT TAC (n=10) | 3.34 ± 0.16  | 2.15 ± 0.2   | 1.1 ± 0.04  | 1.11 ± 0.03  | 41.75 ± 1.18  | 676.08 ± 16.79  | 36.45 ± 3.4  | 112.51 ± 5.97  | 2.62 ± 0.25    |
| KO TAC (n=11) | 3.85 ± 0.16* | 2.82 ± 0.21* | 0.98 ± 0.06 | 1 ± 0.06     | 52.07 ± 1.98* | 460.54 ± 44.66* | 27.55 ± 3.2  | 121.18 ± 10.14 | 1.99 ± 0.25    |
| 4-week        | LVEDD (mm)   | LVESD (mm)   | SWT (mm)    | PWT (mm)     | AET (ms)      | HR (BPM)        | FS (%)       | LVm (mg)       | mVcFc (circ/s) |
| WT Sham (n=6) | 2.98 ± 0.16  | 1.39 ± 0.11  | 0.88 ± 0.04 | 0.9 ± 0.1    | 36.69 ± 1.49  | 743.3 ± 11.95   | 53.62 ± 1.95 | 70.58 ± 9.82   | 4.19 ± 0.22    |
| KO Sham (n=6) | 3.25 ± 0.22  | 1.63 ± 0.19  | 0.93 ± 0.06 | 1.04 ± 0.09  | 37.92 ± 1.92  | 653.89 ± 39.9   | 50.83 ± 2.71 | 90.68 ± 6.48   | 4.12 ± 0.29    |
| WT TAC (n=10) | 3.94 ± 0.17  | 2.94 ± 0.25  | 1.13 ± 0.05 | 1 ± 0.06     | 40.76 ± 1.21  | 724.09 ± 11.13  | 26.41 ± 3.79 | 136.92 ± 8.11  | 1.92 ± 0.31    |
| KO TAC (n=11) | 4.28 ± 0.21  | 3.7 ± 0.25*  | 1.24 ± 0.07 | 1 ± 0.05     | 49.07 ± 1.59* | 535.33 ± 41.61* | 14.2 ± 1.9*  | 170.55 ± 9.98* | 0.98 ± 0.13*   |

Table S3: Echocardiography data from WT and Thy1KO mice displayed as mean ± SEM. LVEDD: Left Ventricular (LV) End Diastolic Dimension; LVESD: LV End Systolic Dimension; SWT: Septal Wall Thickness; PWT: Posterior Wall Thickness; AET: Aortic Ejection Time; HR: Heart Rate; BPM: Beats Per Minute; LVm: LV mass; FS: Fractional Shortening, mVcFc: Mean Velocity of Circumferential Shortening Corrected for Heart Rate calculated as  $VcFc = (\text{Fractional Shortening}/\text{Aortic Ejection Time}) \times (60/\text{Heart Rate})^{0.5}$ ; \*P < 0.05 KO TAC vs. WT TAC, #P < 0.05 KO Sham vs. WT Sham by 1-way ANOVA with Bonferroni's multiple comparisons test.
